# Supplementary material
Source: PubMed Central journal article supplement (PMC1142491)

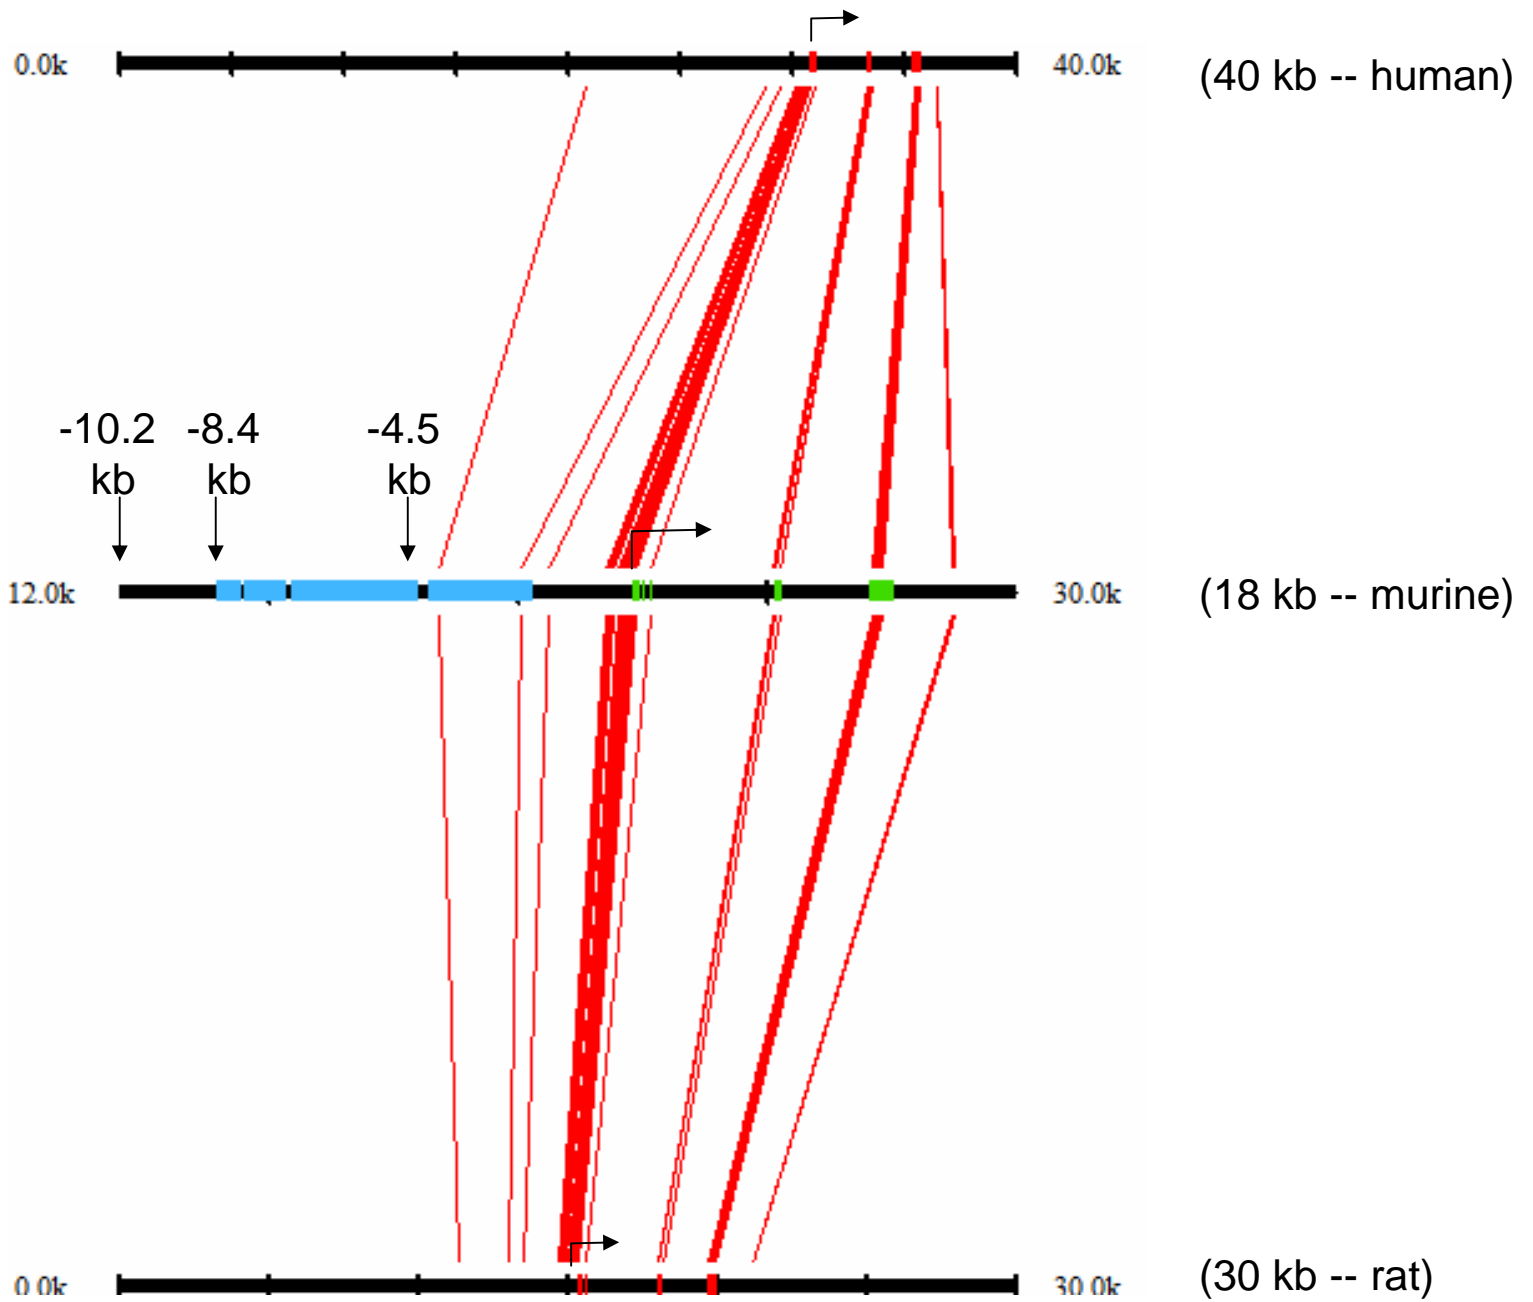

Adachi Sfig 1

**A**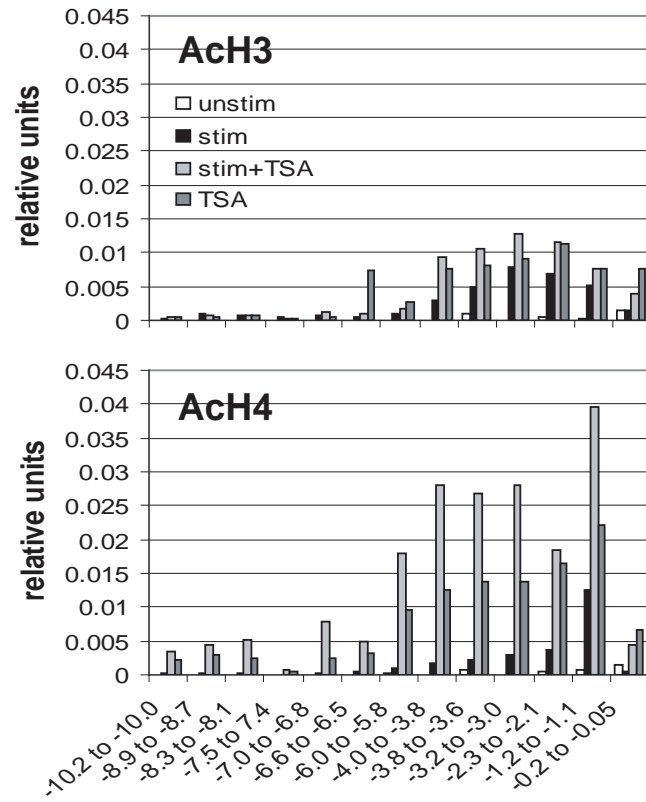**B**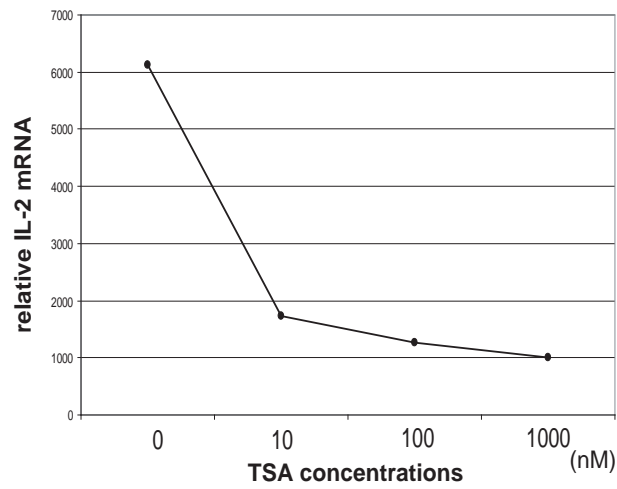

Supp Fig. 2 Adachi

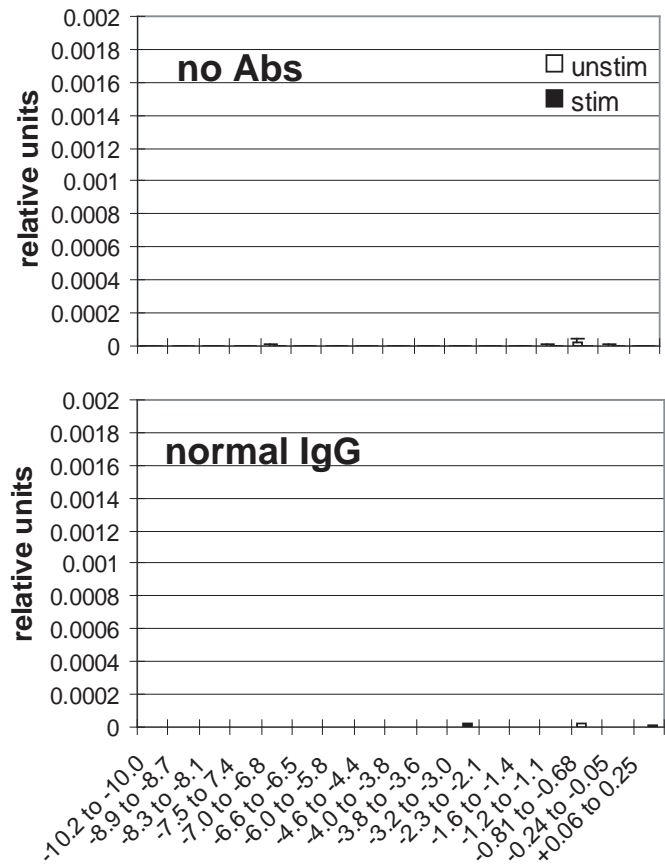

Supp Fig.3 Adachi

Supplement: nar_33_10_3200__1.pdf [file nar_33_10_3200__1.pdf]
